# Supplementary material for: Real-Life Assessment of the Ability of an Ultraviolet C Lamp (SanificaAria 200, Beghelli) to Inactivate Airborne Microorganisms in a Healthcare Environment
Source: MDPI journal article supplement (doi:10.3390/life13051221), 2023-05-20
Supplement: s1 [file s1]

## Supplementary materials

**Supplementary Table S1. Technical features of SanificaAria 200 (Beghelli)**

| Technical features                                                | Value                                                                                                                                                                                                                                                |
|-------------------------------------------------------------------|------------------------------------------------------------------------------------------------------------------------------------------------------------------------------------------------------------------------------------------------------|
| Power supply                                                      | 90-253W, 50÷60Hz                                                                                                                                                                                                                                     |
| Maximum absorption                                                | <75W                                                                                                                                                                                                                                                 |
| UV-C Lamp                                                         | 2 X TC 2G11 24W (total 48W)                                                                                                                                                                                                                          |
| Ozone free UV-C Lamp                                              | /                                                                                                                                                                                                                                                    |
| UV-C Lamp radiant power                                           | 14W                                                                                                                                                                                                                                                  |
| UV-C wavelength                                                   | 254 nm                                                                                                                                                                                                                                               |
| Lamp life                                                         | 12 months (depending on use)                                                                                                                                                                                                                         |
| Weight                                                            | 13 kg (10 kg without bracket)                                                                                                                                                                                                                        |
| Device equipped with Bluetooth and WIFI System for remote control | /                                                                                                                                                                                                                                                    |
| Product classification                                            | The product can be classified as an air purifier according to IEC 60335-2-65: 2002 "Household appliances and similar appliances - Safety - Part 2-65: particular requirements for air purification equipment in compliance with (paragraph 32.102) " |

  

| Fan speed | Flow of treated air   | Noise level        |
|-----------|-----------------------|--------------------|
| I         | 81 m <sup>3</sup> /h  | 38dB(A) to 1 meter |
| II        | 130 m <sup>3</sup> /h | 47dB(A) to 1 meter |
| III       | 200 m <sup>3</sup> /h | 59dB(A) to 1 meter |

**Supplementary Table S2. Example of the work diagram related to preliminary samplings in a hospital room of a private clinic in Bologna urban area**

|                                                                                                                                                                     |                                                                                                                               |                                                                                                                                                        |                                                                                                                   |
|---------------------------------------------------------------------------------------------------------------------------------------------------------------------|-------------------------------------------------------------------------------------------------------------------------------|--------------------------------------------------------------------------------------------------------------------------------------------------------|-------------------------------------------------------------------------------------------------------------------|
| <b><i>Monday 6/12/21 from</i></b><br><b><i>9.05 to 9.20</i></b><br>Room number 211<br>Two patients present<br>Room measurements<br>3x4,5x3 m (40 m <sup>3</sup> )   | <b><i>Monday 6/12/21 from</i></b><br><b><i>11.10 to 11.25</i></b><br>Room number 211<br>One patient and two<br>nurses present | <b><i>Monday 6/12/21</i></b><br><b><i>from 12.55 to 13.10</i></b><br>Room number 211<br>Two patients<br>present                                        | <b><i>Monday 6/12/21</i></b><br><b><i>from 16.00 to 16.15</i></b><br>Room number 211<br>Two patients<br>present   |
| <b><i>Tuesday 7/12/21 from</i></b><br><b><i>9.20 to 9.35</i></b><br>Room number 213<br>Two patients present<br>Room measurements<br>3x4,5x3 m (40 m <sup>3</sup> )  | <b><i>Tuesday 7/12/21 from</i></b><br><b><i>11.20 to 11.35</i></b><br>Room number 213<br>One patient presents                 | <b><i>Tuesday 7/12/21</i></b><br><b><i>from 13.10 to 13.25</i></b><br>Room number 213<br>Two patients, one<br>physiotherapist and<br>one nurse present | <b><i>Martedì 7/12/21</i></b><br><b><i>from 15.45 to 16.00</i></b><br>Camera number<br>213<br>Two patient present |
| <b><i>Thursday 9/12/21 from</i></b><br><b><i>9.20 to 9.35</i></b><br>Room number 206<br>Two patients present<br>Room measurements<br>3x4,5x3 m (40 m <sup>3</sup> ) | <b><i>Thursday 9/12/21 from</i></b><br><b><i>11.10 to 11.25</i></b><br>Room number 206<br>One patient presents                | <b><i>Thursday 9/12/21</i></b><br><b><i>from 12.55 to 13.10</i></b><br>Room number 206<br>One patient<br>presents                                      | <b><i>Thursday 9/12/21</i></b><br><b><i>from 15.55 to 16.10</i></b><br>Room number 206<br>One patient<br>presents |
| <b><i>Friday 10/12/21 from</i></b><br><b><i>9.20 to 9.35</i></b><br>Room number 224<br>One patient presents                                                         | <b><i>Friday 10/12/21 from</i></b><br><b><i>11.15 to 11.30</i></b><br>Room number 224<br>Two patients present                 | <b><i>Friday 10/12/21</i></b><br><b><i>from 13.05 to 13.20</i></b><br>Room number 224<br>Two patients<br>present                                       | <b><i>Friday 10/12/21</i></b><br><b><i>from 15.50 to 16.05</i></b><br>Room number 224<br>Two patients<br>present  |

|                                                                                                                                                   |                                                                               |                                                                                       |                                                                                       |
|---------------------------------------------------------------------------------------------------------------------------------------------------|-------------------------------------------------------------------------------|---------------------------------------------------------------------------------------|---------------------------------------------------------------------------------------|
| Room measurements<br>4,5x4,5x3 m (60 m <sup>3</sup> )                                                                                             |                                                                               |                                                                                       |                                                                                       |
| <i>Monday 13/12/21 from 9.50 to 10.05</i><br>Room number 219<br>Two patients not present<br>Room measurements<br>4,5x4,5x3 m (60 m <sup>3</sup> ) | <i>Monday 13/12/21 from 11.30 to 11.45</i><br>Room number 219<br>Two patients | <i>Monday 13/12/21 from 13.10 to 13.25</i><br>room number 219<br>Two patients present | <i>Monday 13/12/21 from 15.55 to 16.10</i><br>Room number 219<br>Two patients present |

**Supplementary Table S3. Number of bacterial colonies detected during preliminary samplings.**

The moment of the day when the bacterial load was the highest is highlighted in yellow.

---

|          | Number of colonies (expressed as CFU/m <sup>3</sup> ) |          |          |          |
|----------|-------------------------------------------------------|----------|----------|----------|
| Date     | 9:00 AM                                               | 11:15 AM | 01:00 PM | 04:00 PM |
| 6/12/21  | 76                                                    | 215      | 105      | 95       |
| 7/12/21  | 46                                                    | 86       | 70       | 70       |
| 9/12/21  | 130                                                   | 125      | 72       | 81       |
| 10/12/21 | 117                                                   | 173      | 190      | 159      |
| 13/12/21 | 36                                                    | 89       | 64       | 48       |

**Supplementary Table S4. Details about Experiment A.**

| <b>Sampling</b> | <b>People present**</b>      | <b>Speed SanificaAria 200***</b> |
|-----------------|------------------------------|----------------------------------|
| t <sub>0</sub>  | 2 patients + physiotherapist | Lamp off                         |
| t <sub>1</sub>  | 2 patients (lunch time)      | Medium                           |
| t <sub>2</sub>  | 2 patients (lunch time)      | Medium                           |
| t <sub>3</sub>  | 2 patients                   | Medium                           |
| t <sub>4</sub>  | 1 patient                    | Medium                           |
| t <sub>5</sub>  | 2 patients                   | Medium                           |
| t <sub>6</sub>  | 2 patients                   | Medium                           |
| t <sub>7</sub>  | 1 patient                    | Medium                           |

At the end of the preliminary sampling, the sanitizer was switched on at medium speed.

\*\* Between samples 5-6 and 7-8 the door was always closed. For samples 1-2-3-4 the door was kept open several times by the staff for service reasons.

\*\*\* Between sampling 6 and 7, the sanitizer was set at minimum speed, to reduce background noise, favouring rest.

**Supplementary Table S5. Details about Experiment B.**

| <b>Sampling</b> | <b>People present</b> | <b>Speed SanificaAria 200</b> |
|-----------------|-----------------------|-------------------------------|
| t0              | 6 people              | Lamp off                      |
| t1              | 4 people              | Medium                        |
| t2              | 7 people              | Medium                        |
| t3              | 2 people              | Medium                        |
| t4              | 1 person              | Medium                        |
| t5              | 2 people              | Medium                        |
| t6              | 2 people              | Medium                        |
| t7              | 1 person              | Medium                        |

**Supplementary Figure S1.** Activity of the UVC device against SARS-CoV-2. The upper panel shows the detection of SARS-CoV-2 before the ignition of the device. Already one hour after switching on the UVC lamp, the virus was no longer detected (lower panel)

|  <b>BioFire®</b><br><b>Respiratory Panel 2.1 plus</b> |                                                              | <br><small>A BIOMERIEUX COMPANY</small><br><a href="http://www.BioFireDx.com">www.BioFireDx.com</a> |                                   |
|----------------------------------------------------------------------------------------------------------------------------------------|--------------------------------------------------------------|----------------------------------------------------------------------------------------------------------------------------------------------------------------------------------------|-----------------------------------|
| <b>Run Summary</b>                                                                                                                     |                                                              |                                                                                                                                                                                        |                                   |
| <b>Sample ID:</b>                                                                                                                      | ARIA 1                                                       | <b>Run Date:</b>                                                                                                                                                                       | 17 Mar 2022                       |
| <b>Detected:</b>                                                                                                                       | Severe Acute Respiratory Syndrome Coronavirus 2 (SARS-CoV-2) | <b>Controls:</b>                                                                                                                                                                       | 2:54 PM                           |
| <b>Equivocal:</b>                                                                                                                      | None                                                         |                                                                                                                                                                                        | Passed                            |
| <b>Result Summary</b>                                                                                                                  |                                                              |                                                                                                                                                                                        |                                   |
| <b>Viruses</b>                                                                                                                         |                                                              |                                                                                                                                                                                        |                                   |
| Not Detected                                                                                                                           | Adenovirus                                                   |                                                                                                                                                                                        |                                   |
| Not Detected                                                                                                                           | Coronavirus 229E                                             |                                                                                                                                                                                        |                                   |
| Not Detected                                                                                                                           | Coronavirus HKU1                                             |                                                                                                                                                                                        |                                   |
| Not Detected                                                                                                                           | Coronavirus NL63                                             |                                                                                                                                                                                        |                                   |
| Not Detected                                                                                                                           | Coronavirus OC43                                             |                                                                                                                                                                                        |                                   |
| Not Detected                                                                                                                           | Middle East Respiratory Syndrome Coronavirus (MERS-CoV)      |                                                                                                                                                                                        |                                   |
| ✓ Detected                                                                                                                             | Severe Acute Respiratory Syndrome Coronavirus 2 (SARS-CoV-2) |                                                                                                                                                                                        |                                   |
| Not Detected                                                                                                                           | Human Metapneumovirus                                        |                                                                                                                                                                                        |                                   |
| Not Detected                                                                                                                           | Human Rhinovirus/Enterovirus                                 |                                                                                                                                                                                        |                                   |
| Not Detected                                                                                                                           | Influenza A                                                  |                                                                                                                                                                                        |                                   |
| Not Detected                                                                                                                           | Influenza B                                                  |                                                                                                                                                                                        |                                   |
| Not Detected                                                                                                                           | Parainfluenza Virus 1                                        |                                                                                                                                                                                        |                                   |
| Not Detected                                                                                                                           | Parainfluenza Virus 2                                        |                                                                                                                                                                                        |                                   |
| Not Detected                                                                                                                           | Parainfluenza Virus 3                                        |                                                                                                                                                                                        |                                   |
| Not Detected                                                                                                                           | Parainfluenza Virus 4                                        |                                                                                                                                                                                        |                                   |
| Not Detected                                                                                                                           | Respiratory Syncytial Virus                                  |                                                                                                                                                                                        |                                   |
| <b>Bacteria</b>                                                                                                                        |                                                              |                                                                                                                                                                                        |                                   |
| Not Detected                                                                                                                           | <i>Bordetella parapertussis</i> (IS1001)                     |                                                                                                                                                                                        |                                   |
| Not Detected                                                                                                                           | <i>Bordetella pertussis</i> (ptxP)                           |                                                                                                                                                                                        |                                   |
| Not Detected                                                                                                                           | <i>Chlamydia pneumoniae</i>                                  |                                                                                                                                                                                        |                                   |
| Not Detected                                                                                                                           | <i>Mycoplasma pneumoniae</i>                                 |                                                                                                                                                                                        |                                   |
| <b>Run Details</b>                                                                                                                     |                                                              |                                                                                                                                                                                        |                                   |
| <b>Pouch:</b>                                                                                                                          | RP2.1plus v1.0                                               | <b>Protocol:</b>                                                                                                                                                                       | NPS2 v3.2                         |
| <b>Run Status:</b>                                                                                                                     | Completed                                                    | <b>Operator:</b>                                                                                                                                                                       | Laboratorio Virologia (virologia) |
| <b>Serial No.:</b>                                                                                                                     | 54817128                                                     | <b>Instrument:</b>                                                                                                                                                                     | TM09140                           |
| <b>Lot No.:</b>                                                                                                                        | 29G021                                                       |                                                                                                                                                                                        |                                   |

|  <b>BioFire®</b><br><b>Respiratory Panel 2.1 plus</b> |                                                              | <br><small>A BIOMERIEUX COMPANY</small><br><a href="http://www.BioFireDx.com">www.BioFireDx.com</a> |                                 |
|------------------------------------------------------------------------------------------------------------------------------------------|--------------------------------------------------------------|-----------------------------------------------------------------------------------------------------------------------------------------------------------------------------------------|---------------------------------|
| <b>Run Summary</b>                                                                                                                       |                                                              |                                                                                                                                                                                         |                                 |
| <b>Sample ID:</b>                                                                                                                        | ARIA 2                                                       | <b>Run Date:</b>                                                                                                                                                                        | 17 Mar 2022                     |
| <b>Detected:</b>                                                                                                                         | None                                                         | <b>Controls:</b>                                                                                                                                                                        | 2:39 PM                         |
| <b>Equivocal:</b>                                                                                                                        | None                                                         |                                                                                                                                                                                         | Passed                          |
| <b>Result Summary</b>                                                                                                                    |                                                              |                                                                                                                                                                                         |                                 |
| <b>Viruses</b>                                                                                                                           |                                                              |                                                                                                                                                                                         |                                 |
| Not Detected                                                                                                                             | Adenovirus                                                   |                                                                                                                                                                                         |                                 |
| Not Detected                                                                                                                             | Coronavirus 229E                                             |                                                                                                                                                                                         |                                 |
| Not Detected                                                                                                                             | Coronavirus HKU1                                             |                                                                                                                                                                                         |                                 |
| Not Detected                                                                                                                             | Coronavirus NL63                                             |                                                                                                                                                                                         |                                 |
| Not Detected                                                                                                                             | Coronavirus OC43                                             |                                                                                                                                                                                         |                                 |
| Not Detected                                                                                                                             | Middle East Respiratory Syndrome Coronavirus (MERS-CoV)      |                                                                                                                                                                                         |                                 |
| Not Detected                                                                                                                             | Severe Acute Respiratory Syndrome Coronavirus 2 (SARS-CoV-2) |                                                                                                                                                                                         |                                 |
| Not Detected                                                                                                                             | Human Metapneumovirus                                        |                                                                                                                                                                                         |                                 |
| Not Detected                                                                                                                             | Human Rhinovirus/Enterovirus                                 |                                                                                                                                                                                         |                                 |
| Not Detected                                                                                                                             | Influenza A                                                  |                                                                                                                                                                                         |                                 |
| Not Detected                                                                                                                             | Influenza B                                                  |                                                                                                                                                                                         |                                 |
| Not Detected                                                                                                                             | Parainfluenza Virus 1                                        |                                                                                                                                                                                         |                                 |
| Not Detected                                                                                                                             | Parainfluenza Virus 2                                        |                                                                                                                                                                                         |                                 |
| Not Detected                                                                                                                             | Parainfluenza Virus 3                                        |                                                                                                                                                                                         |                                 |
| Not Detected                                                                                                                             | Parainfluenza Virus 4                                        |                                                                                                                                                                                         |                                 |
| Not Detected                                                                                                                             | Respiratory Syncytial Virus                                  |                                                                                                                                                                                         |                                 |
| <b>Bacteria</b>                                                                                                                          |                                                              |                                                                                                                                                                                         |                                 |
| Not Detected                                                                                                                             | <i>Bordetella parapertussis</i> (IS1001)                     |                                                                                                                                                                                         |                                 |
| Not Detected                                                                                                                             | <i>Bordetella pertussis</i> (ptxP)                           |                                                                                                                                                                                         |                                 |
| Not Detected                                                                                                                             | <i>Chlamydia pneumoniae</i>                                  |                                                                                                                                                                                         |                                 |
| Not Detected                                                                                                                             | <i>Mycoplasma pneumoniae</i>                                 |                                                                                                                                                                                         |                                 |
| <b>Run Details</b>                                                                                                                       |                                                              |                                                                                                                                                                                         |                                 |
| <b>Pouch:</b>                                                                                                                            | RP2.1plus v1.0                                               | <b>Protocol:</b>                                                                                                                                                                        | NPS2 v3.2                       |
| <b>Run Status:</b>                                                                                                                       | Completed                                                    | <b>Operator:</b>                                                                                                                                                                        | virologia virologia (virologia) |
| <b>Serial No.:</b>                                                                                                                       | 54817132                                                     | <b>Instrument:</b>                                                                                                                                                                      | 2FA07396                        |
| <b>Lot No.:</b>                                                                                                                          | 29G021                                                       |                                                                                                                                                                                         |                                 |
